# Supplementary material
Source: publisher site journal article supplement (https://www.degruyter.com/publication/journal_key/CORRREV/downloadAsset/CORRREV_Instructions_for_Authors.pdf)
Supplement: Supplementary file 1 [file CORRREV_Instructions_for_Authors.pdf]

# Corrosion Reviews: Instructions for Authors (last update: February 28, 2022)

## I. Scope and editorial policy

*Corrosion Reviews* is a peer-reviewed journal that publishes critical reviews and, to a lesser extent, outstanding original articles that are key to advancing the understanding and application of corrosion science and engineering in the service of society. *Reviews* may be of a theoretical, experimental or practical nature, provided that they make a significant contribution to knowledge in the field. *Original articles* may be processed if they are on subjects that are considered by the Editors to be of particular interest to the readers.

Manuscripts are independently reviewed by peers selected by the Editors. Decisions are reached as quickly as possible. *Corrosion Reviews* aspires to notify authors within six weeks from submission date. Accepted papers are promptly published online ahead-of-print as soon as they have been finally processed.

**Unpublished material:** Submission of a manuscript to *Corrosion Reviews* implies that the work described is not copyrighted, published or submitted elsewhere, except in abstract form. The corresponding author should ensure that all authors approve the manuscript before its submission to *Corrosion Reviews*.

**Anti-plagiarism policy:** *Corrosion Reviews* strongly discourages plagiarism and related issues. Each manuscript submitted to the journal undergoes an anti-plagiarism check that determines the degree of similarity with contents already published under any form. The Editors reserve the right to reject without reviewing manuscripts with high plagiarism content, or manuscripts that clearly appear to belong to a sequence of very similar works that add no or little scientific value. See also the Publication Ethics and Malpractice Statement on the journal's website.

**Copyright:** Manuscripts are accepted on condition of transfer of copyright (for U.S. government employees: to the extent transferable) to *Corrosion Reviews*. Once the manuscript is accepted, it may not be published elsewhere without the consent of the copyright holders.

## II. Submission of manuscripts

Manuscripts should be submitted online at <https://mc.manuscriptcentral.com/corrosrev>

## III. Preparation of manuscripts

### Cover letter

Each manuscript should be accompanied by a cover letter containing a brief statement by the authors as to the novelty/originality of their article.

### Language

Manuscripts should be written in clear and concise English. Non-native speakers are requested to have their text proofread by a native English speaker prior to submission.

### General format and length

Formatting should be kept to a minimum. Do not create headers or footers, page breaks or arrange your text with the space key. Include page numbers. Please avoid footnotes in the text, use parentheses instead. There is no page limit on *Reviews*. *Original articles* should be as concise as possible; a maximum total of 15 Figures/Tables/Schemes applies.

### Nomenclature and units

Use the International System of Units (SI). Please refer to the IUPAC: Nomenclature of Organic Chemistry (<http://www.iupac.org>) for further information. Chemical names, abbreviations and acronyms should be given in parentheses at their first appearance in the text. Temperatures should be given in °C. The unit 'billion' ( $10^9$  in America,  $10^{12}$  in Europe) is ambiguous and should be avoided. Axes for graphs and headings for tables should be given in quantity calculus form, e.g. times as  $t$  (s), potential as  $E$  (mV vs. SHE), current density as  $i$  (mA/cm<sup>2</sup>).

## Manuscript structure

Title page, abstract (max. 200 words), keywords (max. 5), main text, acknowledgments, research funding information, conflict of interest statement, references list, figure captions.

All section headings of the main text/body must pls. be numbered consecutively. Abbreviations should be explained at first mention in the text/body, thereafter the abbreviations should be used only. A list of non-standard abbreviations should be included if there are more than 10. A nomenclature list at the end of the paper is recommended when many symbols are included in the text. Equations must be clearly printed and numbered sequentially with Arabic numbers enclosed with round parentheses at the right-hand margin.

Revised *Reviews* may be accompanied by photographs and short CVs of the corresponding author and the co-authors (max. 80 words per author, written in 3rd person singular); the number is restricted to five authors.

## References

The journal uses **Harvard style**. Pls apply the rules as outlined in the **reference style sheet at the end of this document**. Thank you.

## Tables

Submit tables on separate pages and number them consecutively using Arabic numerals. Provide a short descriptive title, column headings, and (if necessary) footnotes to make each table self-explanatory. Refer to tables in the text as Table 1, etc. Use Table 1, etc. in the table legends.

## Figures

**General requirements:** All illustrations must be of reproduction-ready quality. They will be reduced in size to fit, whenever possible, the width of a single column. Lettering of all figures within the article should be uniform in style (preferably a sans serif typeface like Helvetica) and of sufficient size (ca. 8 pt.). Uppercase letters A, B, C, etc. should be used to identify parts of multi-part figures. Cite all figures in the text in numerical order. Do not embed figures within the text body of the manuscript; submit figures in separate files.

**Graphical abstract figure and text for the table of contents:** A graphical abstract figure (minimum resolution of 300 dpi and of good contrast) and a graphical abstract text (consisting of the article title, all author names without affiliations and one sentence summary of the manuscript followed by max. 5 keywords used in the main text) for the table of contents may be provided. These parts are meant to provide the reader a summary of the research reviewed in the paper. For publication, graphical abstract text and figure will be assembled by the typesetters.

**Halftone figures (grayscale and color)** should have a minimum resolution of 300 dpi and be of good contrast. Authors are encouraged to submit illustrations in color if necessary for their scientific content. Publication of color figures is provided free of charge both in online and print editions.

**Line drawings** must be of reproduction-ready quality. Please note that faint shading may be lost upon reproduction. When drawing bar graphs, use patterning instead of grayscales. Lettering of all figures should be uniform in style. A resolution of 1200 dpi is recommended. A resolution of 1200 dpi is recommended.

**Figure legends:** Provide a short descriptive title and a legend to make each figure self-explanatory on separate pages. Explain all symbols used in the figures. Remember to use the same abbreviations as in the text body.

## Use of third-party material/copyright permissions

It is the authors' responsibility to obtain permission to reproduce original or modified material that has been previously published. Copyright permissions can be obtained through the Copyright Clearance Center ([www.copyright.com](http://www.copyright.com)).

#### IV. Proofing and publication

##### Proof for correction

Authors of accepted papers will receive a proof for correction. At proof stage, only minor changes other than corrections of printers' errors are allowed. As per De Gruyter policy, no author list changes are permitted after acceptance of an article. The De Gruyter production team is instructed to enforce this policy during the production/proofing process.

##### Open access publication

De Gruyter offers open access publication. For details, pls. go to <https://www.degruyter.com/publishing/publications/openaccess>. At proof stage, authors are informed about this option.

##### Published PDF file for authors

The electronic files of typeset articles in Adobe Acrobat PDF format are provided free of charge; corresponding authors receive notification that their article has been published online.

##### Note for authors of NIH-funded research

De Gruyter acknowledges that the author of a US-agency-funded article retains the right to provide a copy of the final manuscript to agency upon acceptance for publication or thereafter, for public archiving in PubMed Central 12 months after publication in *Corrosion Reviews*. Note that only the accepted author's version of the manuscript, not the PDF file of the published article, may be used for NIH archiving.

##### Contact Editorial Office *Corrosion Reviews*:

De Gruyter  
Genthiner Str. 13  
10785 Berlin, Germany  
Tel. +49-30-26005-279  
E-mail: [corros.rev.editorial@degruyter.com](mailto:corros.rev.editorial@degruyter.com)  
<https://www.degruyter.com/corrrev>

### Harvard Reference Style

| In-text citation                                                 |                                                       |                                                                                      |
|------------------------------------------------------------------|-------------------------------------------------------|--------------------------------------------------------------------------------------|
|                                                                  | Direct citation                                       | Indirect citation                                                                    |
| Single author                                                    | Paccagnella (2015)                                    | (Paccagnella 2015)                                                                   |
| Two authors                                                      | Borgonovi and Burns (2015)                            | (Borgonovi and Burns 2015)                                                           |
| More than two authors                                            | Martin et al. (2014)                                  | (Martin et al. 2014)                                                                 |
| Series of references                                             | Zabal et al. (2014) and Mohadjer et al. (2013a)       | <b><i>Alphabetical order</i></b><br>(Mohadjer et al. 2013a; Zabal et al. 2014).      |
| Same author group with different years                           | Smith et al. (1985, 1986)                             | (Smith et al. 1985, 1986)                                                            |
| Same author group with same year                                 | Lawrence and David (2009a,b)                          | (Lawrence and David 2009a,b)                                                         |
| Author (with same surname and different initials) with same year | T.H.E. Smith et al. (2003) and A. Smith et al. (2003) | <b><i>Alphabetical order</i></b><br>(A. Smith et al. 2003; T.H.E. Smith et al. 2003) |
| Journal titles                                                   | Abbreviated with end period/Roman                     |                                                                                      |

|                                                            |                                                                                                                                                                                                                                                                                                                           |
|------------------------------------------------------------|---------------------------------------------------------------------------------------------------------------------------------------------------------------------------------------------------------------------------------------------------------------------------------------------------------------------------|
| Issue number                                               | Not allowed                                                                                                                                                                                                                                                                                                               |
| Punctuation b/w journal title and volume                   | Only space                                                                                                                                                                                                                                                                                                                |
| <b>Reference list</b>                                      |                                                                                                                                                                                                                                                                                                                           |
| <b>Reference type</b>                                      | <b>Example</b>                                                                                                                                                                                                                                                                                                            |
| Reference list order                                       | Alphabetical order                                                                                                                                                                                                                                                                                                        |
| 1. Journal                                                 | Melitz, M.J. (2003). The impact of trade on intra-industry reallocations and aggregate industry productivity. <i>Econometrica</i> 71: 1695–1725.                                                                                                                                                                          |
| 2. Journal with supplement                                 | Yuan, M. and Liu, H. (2011). The economic consequences of fair value accounting. <i>Account. Econ. Law</i> 1(Suppl. 2): 1–42.                                                                                                                                                                                             |
| 3. Collaboration                                           | Institute of Chartered Accountants in Australia (2004). <i>AASB standards for 2005: equivalents to IFRSs as at August 2004</i> , Person Education, Sydney, Australia.                                                                                                                                                     |
| 4. et al. usage (more than ten authors followed by et al.) | Kaye, K., Day, R.D., Hair, E.C., Moore, K.A., Hadley, A.M., Teixeira, P.J., Helmschrott, S., Massing, N., Ackermann, D., and Yuan, M., et al. (2009). Parent marital quality and the parent-adolescent relationship: effects on sexual activity among adolescents and youth. <i>Marriage &amp; Fam. Rev.</i> 45: 270–288. |
| 5. Epub ahead of print                                     | Mason, E.B., Burkhart, K., and Lazebnik, R. (2018). Adolescent stress management in a primary care clinic. <i>Journal of Pediatric Health Care</i> , DOI: 10.1016/j.pedhc.2018.08.001 (Epub ahead of print).                                                                                                              |
| 6. Reference – in press                                    | Tappy, L. and Lara, K.A. (in press). Metabolic effects of fructose and the worldwide increase in obesity. <i>Physiol. Rev.</i>                                                                                                                                                                                            |
| 7. Book/monograph                                          | Andreasen, N.C. (2001). <i>Brave new brain: conquering mental illness in the era of the genome</i> . Oxford University Press, Oxford.                                                                                                                                                                                     |
| 8. Book with edition                                       | Hicks, J.R. (1946). <i>Value and capital</i> , 2nd ed. Oxford: Clarendon.                                                                                                                                                                                                                                                 |
| 9. Edited book                                             | Hertel, T.W. (Ed.) (1997). <i>Global trade analysis: modeling and applications</i> . Western Sydney University, Penrith.                                                                                                                                                                                                  |
| 10. Edited book with chapter title                         | Ferres, K. (2001). Idiot box: television, urban myths and ethical scenarios. In: Craven, I. (Ed.). <i>Australian cinema in the 1990s</i> . Frank Cass, London, pp. 175–188.                                                                                                                                               |
| 11. Edited book series                                     | Langacker, R.W. (2004). Possession, location, and existence. In: Augusto S. and Gonçalves, M. (Eds.), <i>Linguagem, cultura e cognição: Estudos de linguística</i>                                                                                                                                                        |

|                                           |                                                                                                                                                                                                                                                                                                                                                             |
|-------------------------------------------|-------------------------------------------------------------------------------------------------------------------------------------------------------------------------------------------------------------------------------------------------------------------------------------------------------------------------------------------------------------|
|                                           | <i>cognitiva</i> , Vol. I. Almedina, Coimbra, pp. 85–120.                                                                                                                                                                                                                                                                                                   |
| 12. Proceedings/Conferences               | Chang, S.S., Liaw, L., and Ruppenhofer, J. (Eds.) (2000). <i>Proceedings of the twenty-fifth annual meeting of the Berkeley Linguistics Society, February 12-15, 1999: general session and parasession on loan word phenomena</i> . Berkeley Linguistics Soc., Berkeley.                                                                                    |
| 13. Electronic publication (Available at) | Cooper, D. (2009). Native ant may stop toad in its tracks. ABC Science, Available at:<br>< <a href="http://www.abc.net.au/science/articles/2009/03/31/2530686.htm?site=science&amp;topic=latest">http://www.abc.net.au/science/articles/2009/03/31/2530686.htm?site=science&amp;topic=latest</a> >.                                                         |
| 14. Electronic publication (Accessed)     | Este, J., Warren, C., Connor, L., Brown, M., Pollard, R., and O'Connor, T. (2008). Life in the clickstream: the future of journalism. Media Entertainment and Arts Alliance, Available at:<br>< <a href="http://www.alliance.org.au/documents/foj_report_final.pdf">http://www.alliance.org.au/documents/foj_report_final.pdf</a> > (Accessed 27 May 2009). |
| 15. Thesis/Dissertation                   | Fayadh, K.H. (2015). <i>The legal regulation of assisted reproductive technology in Iraq: lessons from the Australian approach</i> , Ph.D. thesis. Penrith, Western Sydney University.                                                                                                                                                                      |
| 16. Report                                | Pataki, Z. (2014). The cost of non-Europe in the single market. Technical Report 9051, European Parliamentary Research Service.                                                                                                                                                                                                                             |
| 17. Patent                                | Smith, P.S. (2002). A pump for use in windmill assembly, application no. 2008230011.                                                                                                                                                                                                                                                                        |
| 18. Standards                             | Standards Australia (1989). <i>Electrical equipment for coal mines – insulating materials – materials for insulating power conducting components</i> (AS 1147.1-1989).                                                                                                                                                                                      |
